# Supplementary material for: Elevated sCD40L in Secondary Progressive Multiple Sclerosis in Comparison to Non-progressive Benign and Relapsing Remitting Multiple Sclerosis
Source: PubMed Central journal article supplement — J Cent Nerv Syst Dis. 2021 Oct 25;13:11795735211050712. doi: 10.1177/11795735211050712 (PMC8552403; doi:10.1177/11795735211050712), 2021-10-25
Supplement: sj-pdf-1-cns-10.1177_11795735211050712.pdf [file sj-pdf-1-cns-10.1177_11795735211050712.pdf]

**Supplementary Table 1:** Plasma cytokine concentration did not show significant difference among different types of multiple sclerosis compared with healthy control

| Analytes                 | Kruskal-Wallis test | Median (25%-75% range) |                     |                      |                      | Dunn's Multiplex Comparison (P value) |         |         |         |         |         |
|--------------------------|---------------------|------------------------|---------------------|----------------------|----------------------|---------------------------------------|---------|---------|---------|---------|---------|
|                          |                     |                        |                     |                      |                      | HC vs                                 |         |         | RRMS vs |         | BMS     |
|                          | P value             | HC                     | RRMS                | BMS                  | SPMS                 | RRMS                                  | BMS     | SPMS    | BMS     | SPMS    | SPMS    |
| IL-8/<br>CXCL8           | 0.0748              | 5.82 (2.14-18.90)      | 11.75 (2.78-26.79)  | 14.22 (8.69-40.44)   | 43.47 (6.85-140.00)  | >0.9999                               | 0.4122  | 0.119   | >0.9999 | 0.7161  | >0.9999 |
| IFN $\gamma$             | 0.0812              | 6.55 (4.54-12.32)      | 5.7 (2.32-24.10)    | 16.61 (9.195-64.32)  | 6.55 (2.678-17.24)   | >0.9999                               | 0.7176  | >0.9999 | 0.1656  | >0.9999 | 0.1344  |
| IL-4                     | 0.0848              | 1.6 (1.6-25.13)        | 5.17 (0.58-30.73)   | 48.73 (12.48-228.30) | 12.28 (1.6-249.00)   | >0.9999                               | 0.2718  | >0.9999 | 0.1671  | >0.9999 | >0.8869 |
| IL-15                    | 0.0905              | 1.42 (0.42-2.20)       | 1.935 (0.75-18.39)  | 12.46 (2.83-33.60)   | 3.96 (0.42-35.53)    | >0.9999                               | 0.1059  | 0.43    | 0.7072  | >0.9999 | >0.9999 |
| MIP-1 $\alpha$ /<br>CCL3 | 0.1082              | 2.47 (1.12-6.09)       | 7.34 (0.48-15.66)   | 15.38 (4.94-22.68)   | 13.59 (4.07-27.44)   | >0.9999                               | 0.3139  | 0.1963  | >0.9999 | >0.9999 | >0.9999 |
| VEGF                     | 0.1429              | 78.34 (43.20-114.50)   | 34.64 (4.49-85.82)  | 98.26 (48.14-123.70) | 85.08 (60.55-133.10) | >0.9999                               | >0.9999 | >0.9999 | 0.3293  | 0.1445  | >0.9999 |
| IL-6                     | 0.1492              | 2.87 (0.39-7.97)       | 1.65 (0.35-26.07)   | 35.01(3.67-103.10)   | 8.16 (0.35-388.50)   | >0.9999                               | 0.5398  | >0.9999 | 0.278   | 0.9537  | >0.9999 |
| IL-10                    | 0.1630              | 1.28 (0.89-2.71)       | 1.54 (0.53-20.99)   | 8.60 (4.53-20.95)    | 2.47 (0.86-20.65)    | >0.9999                               | 0.2226  | 0.9612  | 0.7382  | >0.9999 | >0.9999 |
| TNF $\alpha$             | 0.1807              | 10.80 (7.52-16.72)     | 14.42 (12.11-18.98) | 16.46 (13.80-24.55)  | 17.50 (13.58-28.08)  | >0.9999                               | 0.3852  | 0.3386  | >0.9999 | >0.9999 | >0.9999 |
| IL-7                     | 0.1915              | 4.02 (1.96-10.35)      | 5.06 (3.19-6.53)    | 6.77 (3.55-11.41)    | 7.97 (5.01-14.94)    | >0.9999                               | >0.9999 | 0.6851  | >0.9999 | 0.5046  | >0.9999 |
| MDC/<br>CCL22            | 0.2003              | 1860 (804-2542)        | 1413 (904-1811)     | 672 (544-1531)       | 980 (664-2842)       | >0.9999                               | 0.4423  | >0.9999 | 0.4992  | >0.9999 | >0.9999 |
| IP-10/<br>CXCL10         | 0.2277              | 793 (447-1362)         | 442 (244-685)       | 598 (406-1234)       | 600 (463-928)        | 0.5512                                | >0.9999 | >0.9999 | >0.9999 | 0.3084  | >0.9999 |
| IFN $\alpha$ 2           | 0.2493              | 8.00 (8.00-52.14)      | 23.06 (8.75-49.08)  | 47.36 (21.80-80.65)  | 36.91 (11.10-108.2)  | >0.9999                               | >0.9999 | 0.9474  | 0.9841  | 0.8055  | >0.9999 |

|                                     |        |                      |                      |                       |                      |         |         |         |         |         |         |
|-------------------------------------|--------|----------------------|----------------------|-----------------------|----------------------|---------|---------|---------|---------|---------|---------|
| <b>FGF2</b>                         | 0.2967 | 58.12 (40.06-104.30) | 52.48 (28.65-116.90) | 106.20 (65.28-191.50) | 62.95 (32.10-113.60) | >0.9999 | 0.9468  | >0.9999 | 0.7486  | >0.9999 | 0.6147  |
| <b>IL-17A</b>                       | 0.2990 | 1.48 (0.95-5.78)     | 4.67 (1.52-6.58)     | 5.73 (2.67-16.84)     | 2.53 (0.80-8.12)     | >0.9999 | 0.7904  | >0.9999 | >0.9999 | >0.9999 | 0.515   |
| <b>IL-9</b>                         | 0.3033 | 0.09 (0.09-0.33)     | 0.12 (0.12-9.96)     | 3.53 (0.0.20-11.28)   | 0.22 (0.09-9.04)     | 0.9181  | 0.3555  | >0.9999 | >0.9999 | >0.9999 | >0.9999 |
| <b>G-CSF</b>                        | 0.3325 | 8.59 (2.75-23.86)    | 15.40 (8.15-19.30)   | 28.17 (9.41-81.34)    | 18.67 (4.80-48.59)   | >0.9999 | 0.5804  | >0.9999 | >0.9999 | >0.9999 | >0.9999 |
| <b>GM-CSF</b>                       | 0.3370 | 5.71 (1.87-7.61)     | 3.64 (2.28-14.12)    | 14.25 (4.85-22.72)    | 5.93 (3.16-16.39)    | >0.9999 | 0.8835  | >0.9999 | 0.7246  | >0.9999 | >0.9999 |
| <b>MIP-1<math>\beta</math>/CCL4</b> | 0.3894 | 28.58 (7.69-51.94)   | 41.85 (19.47-59.22)  | 46.87 (27.65-82.03)   | 56.15 (22.36-113.5)  | >0.9999 | >0.9999 | 0.771   | >0.9999 | >0.9999 | >0.9999 |
| <b>IL-5</b>                         | 0.4140 | 0.75 (0.49-1.83)     | 0.87(0.69-1.19)      | 3.13 (0.85-9.32)      | 0.88 (0.52-11.48)    | >0.9999 | >0.9999 | >0.9999 | >0.9999 | >0.9999 | 0.9388  |
| <b>IL-2</b>                         | 0.5540 | 1.52(0.84-2.85)      | 1.66 (0.97-2.90)     | 2.78 (1.29-5.57)      | 1.57 (0.63-4.06)     | >0.9999 | >0.9999 | >0.9999 | >0.9999 | >0.9999 | >0.9999 |
| <b>IL-3</b>                         | 0.6710 | 0.69 (0.39-1.08)     | 1.21 (0.79-1.37)     | 0.82 (0.57-1.52)      | 1.22 (0.13-2.20)     | >0.9999 | >0.9999 | >0.9999 | >0.9999 | >0.9999 | >0.9999 |
| <b>Gro<math>\alpha</math>/CXCL1</b> | 0.6864 | 1698 (890-2065)      | 892 (439-1671)       | 756 (530-1257)        | 1143 (447-2709)      | >0.9999 | >0.9999 | >0.9999 | >0.9999 | >0.9999 | >0.9999 |
| <b>IL-12p70</b>                     | 0.9800 | 2.87 (1.29-9.94)     | 3.29 (1.22-6.30)     | 2.77 (1.40-9.80)      | 2.87 (1.61-8.42)     | >0.9999 | >0.9999 | >0.9999 | >0.9999 | >0.9999 | >0.9999 |
| <b>Flt-3L</b>                       | 0.9968 | 0.39 (0.39-63.33)    | 2.73(1.60-5.12)      | 1.60 (0.39-40.63)     | 9.49 (0.39-29.76)    | >0.9999 | >0.9999 | >0.9999 | >0.9999 | >0.9999 | >0.9999 |

Plasma derived from healthy controls (HC, n=5), patients with RRMS (n=8), BMS (n=12), and patients with SPMS (n=32) were analyzed using Luminex kit from Millipore. Kruskal-Wallis test and multiple comparison with Dunn's modification between different groups were performed. Median of plasma concentration (pg/ml) are presented followed by 25-75% range in the brackets.

**Supplementary Table 2:** Circulating biomarkers that can discriminate among different MS types

|                                            | <b>AUC</b> | <b>95% CI</b>    | <b>p Value</b> | <b>Cut off (pg/ml)</b> | <b>Sensitivity</b> | <b>Specificity</b> | <b>Likelihood Ratio</b> |
|--------------------------------------------|------------|------------------|----------------|------------------------|--------------------|--------------------|-------------------------|
| <b>RRMS vs SPMS</b>                        |            |                  |                |                        |                    |                    |                         |
| <b>MCP1/CCL2</b>                           | 0.8711     | 0.7218 to 1.000  | 0.0013         | > 369.4                | 90.63              | 87.5               | 7.25                    |
| <b>sCD40L</b>                              | 0.8594     | 0.7462 to 0.9725 | 0.0019         | > 487.6                | 81.25              | 87.5               | 6.50                    |
| <b>MCP1/CCL2 &amp; sCD40L</b>              | 0.9297     | 0.8475 to 1.000  | 0.0002         | NA                     | NA                 | NA                 | NA                      |
| <b>RRMS vs BMS</b>                         |            |                  |                |                        |                    |                    |                         |
| <b>MCP1/CCL2</b>                           | 0.8542     | 0.6651 to 1.000  | 0.0087         | > 371.9                | 75                 | 87.5               | 6.00                    |
| <b>BMS VS SPMS</b>                         |            |                  |                |                        |                    |                    |                         |
| <b>sCD40L</b>                              | 0.7865     | 0.6408 to 0.9321 | 0.0037         | > 2206                 | 53.13              | 91.67              | 6.38                    |
| <b>IFN<math>\gamma</math></b>              | 0.7109     | 0.5575 to 0.8644 | 0.0328         | <7.805                 | 56.25              | 83.33              | 3.38                    |
| <b>sCD40L &amp; IFN<math>\gamma</math></b> | 0.8307     | 0.7078 to 0.9536 | 0.0008         | NA                     | NA                 | NA                 | NA                      |

ROC curve analysis and multiple logistic regression analysis were performed using the plasma level of these soluble factors from RRMS (n=8),

BMS (n=12), and SPMS (n=32), AUC: under curve value, 95% CI: 95% confidence interval.
